# Supplementary material
Source: PubMed Central journal article supplement (PMC4250956)
Supplement: Supp_Table2.pdf [file Supp_Table2.pdf]

## Supplementary Data

SUPPLEMENTARY TABLE S2. SUBSETS OF HIV-1C VIC5 SEQUENCES WITH THE NUMBER OF SEQUENCES, PERCENT SAMPLING DENSITY, AND NUMBER OF REPLICATES

| <i>VIC5 sequences, n</i> | <i>Sampling density, %</i> | <i>Number of replicates</i> |
|--------------------------|----------------------------|-----------------------------|
| 17                       | 1.0%                       | 20                          |
| 26                       | 1.5%                       | 20                          |
| 35                       | 2.0%                       | 10                          |
| 52                       | 3.0%                       | 10                          |
| 69                       | 4.0%                       | 10                          |
| 87                       | 5.0%                       | 10                          |
| 130                      | 7.5%                       | 10                          |
| 173                      | 10%                        | 10                          |
| 260                      | 15%                        | 10                          |
| 346                      | 20%                        | 10                          |
| 433                      | 25%                        | 10                          |
| 519                      | 30%                        | 10                          |
| 693                      | 40%                        | 10                          |
| 866                      | 50%                        | 10                          |
| 1,039                    | 60%                        | 1*                          |
| 1,212                    | 70%                        | 1*                          |

\*Single subsets were selected for the genotyping coverage at 60% and 70%, as the number of sequences in these subsets was close to the total number of available VIC5 sequences,  $n = 1,248$ .
